# A stochastic microscopic approach to the $^{10}\text{Be}$ and $^{11}\text{Be}$ nuclei

Pierre Descouvemont<sup>1,2,\*</sup> and Naoyuki Itagaki<sup>2</sup>

<sup>1</sup>*Physique Nucléaire Théorique et Physique Mathématique, C.P. 229, Université Libre de Bruxelles (ULB), B 1050 Brussels, Belgium*

<sup>2</sup>*Yukawa Institute for Theoretical Physics, Kyoto University, Kyoto 606-8502, Japan*

\*E-mail: pdesc@ulb.ac.be

Received December 2, 2019; Revised December 18, 2019; Accepted December 22, 2019; Published February 28, 2020

.....  
We use a microscopic multicluster model to investigate the structure of  $^{10}\text{Be}$  and of  $^{11}\text{Be}$ . These nuclei are described by  $\alpha + \alpha + n + n$  and  $\alpha + \alpha + n + n + n$  configurations, respectively, within the Generator Coordinate Method (GCM). The 4- and 5-body models raise the problem of a large number of generator coordinates (6 for  $^{10}\text{Be}$  and 9 for  $^{11}\text{Be}$ ), which requires specific treatment. We address this issue by using the Stochastic Variational Method (SVM), which is based on an optimal choice of the basis functions, generated randomly. The model provides good energy spectra for low-lying states of both nuclei. We also compute rms radii and densities, as well as electromagnetic transition probabilities. We analyze the structure of  $^{10}\text{Be}$  and of  $^{11}\text{Be}$  by considering energy curves, where one of the generator coordinates is fixed during the minimization procedure.  
.....

Subject Index    D10, D11, D13

## 1. Introduction

Nuclear clustering is a well-established phenomenon. In particular, the  $\alpha$  particle, due to its large binding energy, is a typical cluster in light nuclei. About 50 years ago, the seminal paper of Ikeda and his collaborators [1] showed that  $\alpha$ -clustering is expected near the  $\alpha$  threshold of  $4N$  nuclei. This conjecture leads to the famous Ikeda diagram and was remarkably confirmed by theory and by experiment. It was even extended to  $N \neq Z$  nuclei (see recent reviews in Refs. [2–5]). For example,  $\alpha + ^{14}\text{C}$  cluster states have been known in  $^{18}\text{O}$  for a long time [6].

Neutron-rich nuclei, in particular in the low-mass region of the nuclear chart, require specific attention. If  $\alpha$  clustering is expected, the role of the external neutrons should be addressed by specific methods. A typical example is  $^6\text{He}$ , which requires three-body models to accurately describe the halo neutrons. Beryllium isotopes are particularly interesting:  $^8\text{Be}$  is the archetype of  $\alpha$ -cluster nuclei. Although unstable, the ground state is well known to have a marked  $\alpha + \alpha$  cluster structure. Going to heavier Be isotopes requires multicluster approaches, where the  $\alpha + \alpha$  structure persists, but where the additional neutrons play a role. Multicluster descriptions have been proposed in the past within the Generator Coordinate Method [7], Antisymmetrized Molecular Dynamics [8,9], the molecular model [10–15] and the Resonating Group Method [16,17]. An experimental review of  $Z = 2 - 4$  neutron-rich isotopes can be found in Ref. [18].

In the present work, we aim to investigate the  $^{10}\text{Be}$  and  $^{11}\text{Be}$  isotopes within the  $\alpha + \alpha + n + n$  and  $\alpha + \alpha + n + n + n$  Generator Coordinate Method (GCM). A previous study on  $^9\text{Be}$  [19] within this microscopic approach shows that the  $\alpha + \alpha + n$  model is able to reproduce many  $^9\text{Be}$  properties. The

main issue in  $^{10}\text{Be}$  and  $^{11}\text{Be}$  is a large number of independent coordinates. In other words, accurate bases require large numbers of functions. This problem can be efficiently addressed by the Stochastic Variational Method (SVM), where a random choice of the basis sets is performed, which permits the optimization of the basis [20,21]. A recent application of the SVM to  $^6\text{Li}$ , considered as a six-body system, has been performed in Ref. [22].

The paper is organized as follows. In Sect. 2, we briefly present the microscopic model, and provide some detail about our use of the SVM. Sections 3 and 4 are devoted to the  $^{10}\text{Be}$  and  $^{11}\text{Be}$  nuclei, respectively. Concluding remarks and outlook are presented in Sect. 5.

## 2. The microscopic multicluster model

### 2.1. Wave functions

The  $^{10}\text{Be}$  and  $^{11}\text{Be}$  isotopes are described in a multicluster model, involving two  $\alpha$  particles and two or three external neutrons (see Fig. 1). The Hamiltonian of the system is given by

$$H = \sum_{i=1}^A t_i - T_{c.m.} + \sum_{i<j=1}^A v_{ij}, \quad (1)$$

where  $t_i$  is the kinetic energy of nucleon  $i$ , and  $v_{ij}$  is a nucleon–nucleon interaction ( $A = 10$  or  $11$ ). The c.m. motion is treated by removing the c.m. kinetic energy  $T_{c.m.}$ . We adopt the Minnesota interaction [23] as the central force, complemented by a short-range spin-orbit term with amplitude  $S_0 = 40 \text{ MeV}\cdot\text{fm}^5$ . This spin-orbit interaction reproduces the energy splitting of the  $p_{3/2}$  and  $p_{1/2}$  resonances in  $^5\text{He}$  [24]. The Minnesota force contains one parameter, the admixture parameter  $u$ , whose standard value is  $u = 1$ , but which can be slightly modified to reproduce important properties of the system. In our work,  $u$  is adjusted on the binding energies of  $^{10}\text{Be}$  or  $^{11}\text{Be}$ . The Coulomb force is treated exactly.

The wave functions are defined within the GCM [3,25,26]. In this microscopic multicluster model, the  $^{10,11}\text{Be}$  isotopes are described by various parameters, referred to as the generator coordinates [3,25], which are illustrated in Fig. 1. As a general statement, the number of generator coordinates

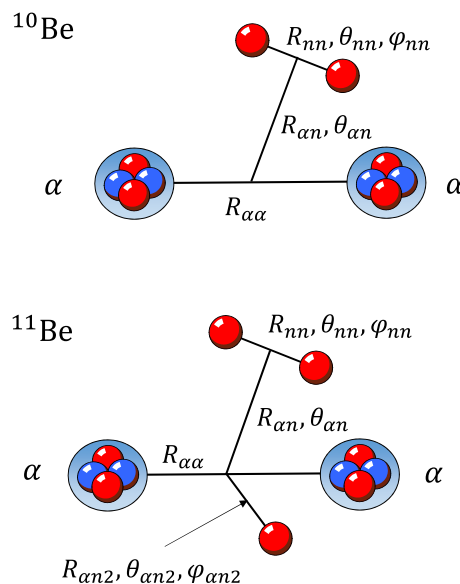

**Fig. 1.**  $^{10}\text{Be}$  and  $^{11}\text{Be}$  configurations with the definitions of the various generator coordinates.

increases with the number of clusters  $N_C$ . For  ${}^9\text{Be}$  [19], we have  $N_C = 3$ . For  ${}^{10}\text{Be}$ , this number increases to  $N_C = 6$ . The various parameters are:  $R_{\alpha\alpha}$ , the distance between the  $\alpha$  particles,  $R_{\alpha n}$ , the distance between the neutron and  $\alpha - \alpha$  center-of-mass, and  $R_{nn}$ , the distance between the external neutrons; three angles  $(\theta_{\alpha n}, \theta_{nn}, \varphi_{nn})$  complement the list. For the  ${}^{11}\text{Be}$  nucleus, the additional neutron introduces three new generator coordinates  $(\theta_{\alpha n2}, \theta_{nn2}, \varphi_{nn2}$ —see Fig. 1).

For the sake of clarity, we denote as  $[R]$  the set of generator coordinates. In other words,  $[R] = (R_{\alpha\alpha}, R_{\alpha n}, \theta_{\alpha n}, R_{nn}, \theta_{nn}, \varphi_{nn})$  for  ${}^{10}\text{Be}$  and  $[R] = (R_{\alpha\alpha}, R_{\alpha n}, \theta_{\alpha n}, R_{nn}, \theta_{nn}, \varphi_{nn}, \theta_{\alpha n2}, \theta_{nn2}, \varphi_{nn2})$  for  ${}^{11}\text{Be}$ . Of course these large numbers of generator coordinates raise the problem of the basis selection. This is addressed by the SVM [20,21], which will be briefly presented in the next subsection.

We first discuss the GCM matrix elements. Let us consider a multicluster wave function as

$$\begin{aligned}\Phi^{[k]}([R], \Omega) &= \mathcal{A}\phi_{\alpha}(\mathcal{S}_1)\phi_{\alpha}(\mathcal{S}_2)\phi_n^{k_1}(\mathcal{S}_3)\phi_n^{k_2}(\mathcal{S}_4) \text{ for } {}^{10}\text{Be}, \\ &= \mathcal{A}\phi_{\alpha}(\mathcal{S}_1)\phi_{\alpha}(\mathcal{S}_2)\phi_n^{k_1}(\mathcal{S}_3)\phi_n^{k_2}(\mathcal{S}_4)\phi_n^{k_3}(\mathcal{S}_5) \text{ for } {}^{11}\text{Be},\end{aligned}\quad (2)$$

where  $\mathcal{S}_i$  are the locations of the clusters. They are calculated from the generator coordinates  $[R]$  and from the Euler angles  $\Omega$ . These Euler angles define the global rotation of the system. In this definition,  $\phi_{\alpha}(\mathcal{S})$  is an  $\alpha$  Bloch–Brink wave function [27] defined as a  $(0s)^4$  Slater determinant, and  $\phi_n^k(\mathcal{S})$  is a neutron spinor with spin projection  $k$ . The  $A$ -body antisymmetrization is taken into account through the operator  $\mathcal{A}$ . In Eq. (2),  $[k]$  stands for the set of spin projections, i.e.  $[k] = (k_1, k_2)$  for  ${}^{10}\text{Be}$  and  $[k] = (k_1, k_2, k_3)$  for  ${}^{11}\text{Be}$ . To simplify the calculations we assume  $k_1 = -k_2 = 1/2$ , which represents the dominant component. For  ${}^{11}\text{Be}$ , we limit the  $k_3$  values to  $k_3 = 1/2$  to keep computer times reasonable. Some tests in simpler conditions (i.e. with a small number of basis functions) have shown that this approximation is quite accurate.

In a second step, the basis function (2) is projected an angular momentum and on parity. A projected basis function is therefore given by

$$\Phi_K^{JM}([R]) = \frac{2J+1}{8\pi^2} \int \mathcal{D}_{MK}^{J*}(\Omega) \mathcal{R}(\Omega) \Phi^{[k]}([R], \Omega) d\Omega, \quad (3)$$

where  $\mathcal{D}_{MK}^J(\Omega)$  is a Wigner function,  $\mathcal{R}(\Omega)$  is the rotation operator, and  $K$  is the projection on the intrinsic axis. The parity projection is performed by superposing another function where the center locations are inverted; in a schematic notation, we have

$$\Phi_K^{JM\pi}([R]) = \frac{1}{2} [\Phi_K^{JM}([R]) + \pi \Phi_K^{JM}(-[R])]. \quad (4)$$

Finally, the total wave function of the system is given by the superposition of many projected basis functions (4), as

$$\Psi^{JM\pi} = \sum_{nK} f_K^{J\pi}([R_n]) \Phi_K^{JM\pi}([R_n]), \quad (5)$$

where  $f_K^{J\pi}([R_n])$  is the generator function, and is obtained from the diagonalization of the Hamiltonian and overlap kernels

$$\begin{aligned}H_{Kn, K'n'}^{J\pi} &= \langle \Phi_K^{JM\pi}([R_n]) | H | \Phi_{K'}^{JM\pi}([R_{n'}]) \rangle, \\ N_{Kn, K'n'}^{J\pi} &= \langle \Phi_K^{JM\pi}([R_n]) | \Phi_{K'}^{JM\pi}([R_{n'}]) \rangle.\end{aligned}\quad (6)$$

These matrix elements, as well as those of other operators (rms radii, densities, electromagnetic operators) are obtained from three-dimensional integrals over the Euler angles. As a large number

of matrix elements (6) is necessary, in particular when we optimize the basis with the SVM, special attention must be paid to the efficiency and to the parallelization of the codes.

## 2.2. Brief description of the SVM

The main issue in the present model is finding an optimal set of basis functions, keeping the total number within reasonable limits. The  $^{10}\text{Be}$  and  $^{11}\text{Be}$  nuclei are described by 6 and 9 generator coordinates, respectively. Notice that the minimization is performed over the generator coordinates  $[R]$ , not over the cluster locations  $\mathcal{S}_i$ . This procedure avoids the redundancy of the wave functions due to translation and rotation invariance. The sets of generator coordinates  $[R]$  contain the minimal number of independent parameters. Obviously, using a standard mesh over each coordinate is not feasible. This problem can be efficiently addressed by using the SVM, widely adopted in problems dealing with large bases (see, for example, Ref. [22] for a recent application).

The SVM has been described in previous references [20,21], and we only give a brief overview here. The SVM is based on a random selection of the basis sets. A first set is determined by randomly generating  $N_S$  sets. Then we perform  $N_S$  calculations with a single basis function, and choose the set corresponding to the minimum energy. For the second basis function, we randomly generate  $N_S$  new sets of basis functions, and perform  $N_S$  calculations of  $2 \times 2$  matrices. From this procedure, we determine the second optimal set of generator coordinates  $[R]$ . Of course, this second step needs two calculations of new matrix elements (diagonal, and coupling to the first set). The process is then repeated until the energy remains nearly constant. Of course, the computer times rapidly increase when the size of the basis increases. In practice, we found that  $N_S \approx 25\text{--}30$  gives a fair convergence. The calculations can be tested by repeating the process with another initial set of basis functions. Obtaining close results is a reliable indication that the energy is converged. This method allows one to reduce the computer times and memory requirements significantly.

As these optimized calculations remain extremely demanding in terms of computing resources, we minimize the ground-state energy and use the same sets for the other states. Again, we have performed tests in simplified conditions, and found insignificant changes.

## 3. The $^{10}\text{Be}$ nucleus

The energy convergence is illustrated in Fig. 2 for several  $J\pi$  values. We use the Minnesota parameter  $u = 0.973$  which reproduces the experimental binding energy with respect to the  $\alpha + \alpha + n + n$  threshold ( $-8.64$  MeV). Experimental states are shown on the right-hand part of the figure. The calculation predicts a  $2^+$  excitation energy in excellent agreement with the experiment, although a  $2_2^+$  state is found below the experimental energy. The convergence is reasonable with about 400 basis functions. We find  $0_2^+$  and  $1^-$  states whose energies differ by 1–2 MeV from the experiment. The  $0_2^+$  state is known to have an  $\alpha + ^6\text{He}$  cluster structure [28], and its theoretical energy might be slightly improved by constraining the random selection to such configurations. For the negative-parity states, a different  $u$  value would permit the more precise reproduction of the experimental energy.

The ground-state proton and neutron densities of the  $^{10}\text{Be}$  ground state are presented in Fig. 3. The transition density between an initial state  $i$  and a final state  $f$  is defined as

$$\rho_{pn}^{if}(\mathbf{r}) = \langle \Psi^{J_f M_f \pi_f} | \sum_{i=1}^A \left( \frac{1}{2} \pm t_{iz} \right) \delta(\mathbf{r} - \mathbf{r}_i) | \Psi^{J_i M_i \pi_i} \rangle, \quad (7)$$

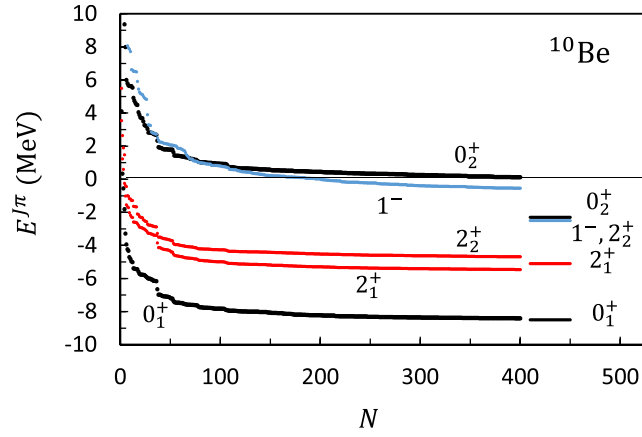

**Fig. 2.** Convergence of  $^{10}\text{Be}$  energies with respect to the number of basis functions  $N$ . The energies are defined from the  $\alpha + \alpha + n + n$  threshold. Experimental energies of low-lying states are shown on the right-hand side of the figure.

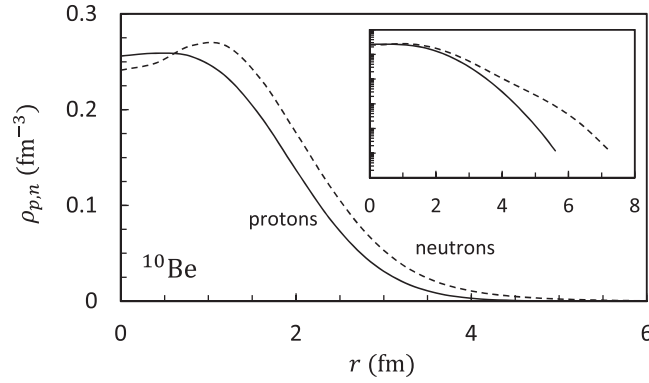

**Fig. 3.** Proton (solid lines) and neutron (dashed lines) monopole densities of the  $^{10}\text{Be}$  ground state. The inset shows the same densities plotted in a logarithmic scale.

where  $t_i$  is the isospin of nucleon  $i$ , and the signs “+” and “-” correspond to the neutron and proton densities, respectively. These densities are expanded in multipoles [29] as

$$\rho_{pn}^{if}(\mathbf{r}) = \sum_{\lambda} \langle J_f M_f \lambda M_f - M_i | J_i M_i \rangle \rho_{pn,\lambda}^{J_f J_i}(r) Y_{\lambda M_f - M_i}^*(\Omega_r), \quad (8)$$

and are computed as explained in Ref. [19]. The monopole ( $\lambda = 0$ ) densities of the ground state are normalized such that

$$\begin{aligned} \sqrt{4\pi} \int \rho_p(r) r^2 dr &= Z \\ \sqrt{4\pi} \int \rho_n(r) r^2 dr &= N, \end{aligned} \quad (9)$$

where  $Z = 4$  and  $N = 6$  for the  $^{10}\text{Be}$  nucleus.

As expected, the neutron density extends to larger distances, owing to the presence of the external neutrons. From these densities, we obtain the rms radii presented in Table 1, and compared with the experimental data of Ref. [30]. The proton radius  $\sqrt{\langle r^2 \rangle_p}$  is in excellent agreement with

**Table 1.**  $^{10}\text{Be}$  properties: proton, neutron and matter radii, as well as the E2 transition probability from the ground to the first excited state.

|                                                     | GCM  | Exp.              | Ref. |
|-----------------------------------------------------|------|-------------------|------|
| $\sqrt{\langle r^2 \rangle_p}$ (fm)                 | 2.27 | $2.357 \pm 0.018$ | [31] |
| $\sqrt{\langle r^2 \rangle_n}$ (fm)                 | 2.67 |                   |      |
| $\sqrt{\langle r^2 \rangle}$ (fm)                   | 2.52 | $2.44 \pm 0.02^1$ | [30] |
| $B(E2, 0^+ \rightarrow 2^+)$ ( $e^2 \text{ fm}^4$ ) | 28.3 | $52 \pm 6$        | [32] |

<sup>1</sup>Corrected for the proton radius.

experimental data, but the matter radius  $\sqrt{\langle r^2 \rangle}$  is slightly larger. Notice that the experimental values are partly model-dependent.

With the GCM wave functions, we can also compute the E2 transition probability. Our value is lower than the experimental one, which suggests that an effective charge is necessary. This is not surprising in neutron-rich nuclei, where polarization effects usually require an effective charge which simulates neutron effects.

To achieve a deeper insight on the  $^{10}\text{Be}$  structure, we have investigated energy curves, where one of the generator coordinates is fixed. The energy curves are presented in Fig. 4 for  $R_{\alpha\alpha}$ ,  $R_{\alpha n}$ , and  $R_{nn}$ . Figure 4(a) shows that the minimum of the energy is obtained for  $R_{\alpha\alpha} \approx 3$  fm, which is lower than in  $^9\text{Be}$  ( $\approx 4$  fm) but still significant. The  $\alpha$ -cluster structure is stronger for  $J = 1^-$ , in agreement with the  $\alpha + ^6\text{He}$  configuration suggested in Ref. [28]. For  $R_{\alpha n}$ , the minimum is found near  $R_{\alpha n} \approx 2$  fm. For  $R_{nn}$ , however, the energy is minimum near  $R_{nn} \approx 3$  fm. This result stresses the importance of a four-body model for  $^{10}\text{Be}$ . A simple dineutron approximation for the external neutrons would not provide accurate wave functions.

#### 4. The $^{11}\text{Be}$ nucleus

The  $^{11}\text{Be}$  nucleus has attracted much interest over the last decades, owing to the well-known parity inversion [33] and to the low binding energy of the ground state. This property makes  $^{11}\text{Be}$  an ideal example of a one-neutron halo nucleus. Many microscopic studies have been devoted to  $^{11}\text{Be}$ : the GCM [7,34], Antisymmetrized Molecular Dynamics [35], and, more recently, the No Core Shell Model, [36] where it is shown that an explicit treatment of the  $^{10}\text{Be} + n$  cluster structure is necessary to reproduce the large  $B(E1)$  transition probability between the  $1/2^+$  ground state and the  $1/2^-$  first excited state. In most models, however, the parity inversion cannot be reproduced with a common interaction. A parity-dependent interaction must be adopted.

In the present work, we aim to investigate the  $^{11}\text{Be}$  structure in the framework of a multicluster approach. An improvement with respect to Ref. [7] is the use of a more efficient method to select the optimal basis, and therefore to get more precise properties of  $^{11}\text{Be}$ . As mentioned in the introduction, the GCM description of  $^{11}\text{Be}$  involves 9 generator coordinates, and the use of the SVM turns out to be quite useful in keeping the basis within a reasonable size.

We first illustrate the energy convergence of various states in Fig. 5. The admixture parameter  $u$  has been adjusted to the experimental neutron separation energy. As is well known, effective forces such as the Minnesota interaction cannot reproduce the  $1/2^+$  and  $1/2^-$  energies simultaneously. This parity effect can be partly simulated by adopting different values for the admixture parameter  $u$ . With  $u = 1.066$  for positive parity and  $u = 0.893$  for negative parity, we reproduce the energy of the  $1/2^+$  and  $1/2^-$  states ( $-0.50$  MeV and  $-0.18$  MeV, respectively, with respect to the  $^{10}\text{Be} + n$

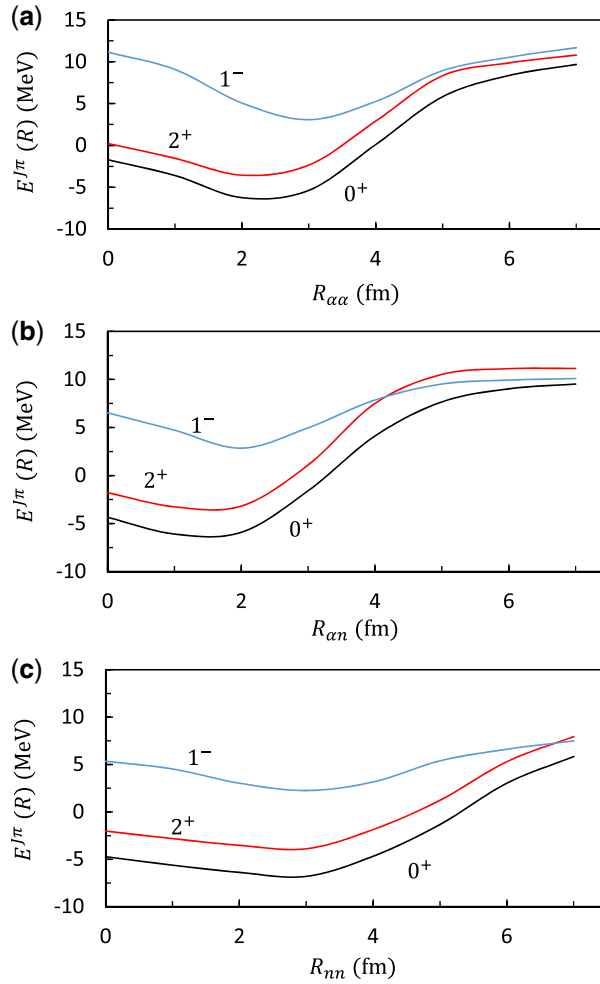

**Fig. 4.** Energy of the  $^{10}\text{Be}$  system (with respect to the  $\alpha + \alpha + n + n$  threshold) as a function of  $R_{\alpha\alpha}$  (a),  $R_{\alpha n}$  (b) and  $R_{nn}$  (c).

threshold). Reproducing the experimental binding energies is crucial for the asymptotic part of the wave functions.

Strictly speaking, the states above threshold need to include scattering boundary conditions. We use, however, the bound-state approximation, which is known to provide reliable energies for narrow states. These energies are obtained consistently with those of the bound states, i.e. from the diagonalization of the Hamiltonian kernel. Figure 5 shows that a fair convergence can be achieved with about 600–700 basis functions. A similar number of basis functions has been employed for the 6-nucleon description of  $^6\text{Li}$  [22]. The model not only provides the ground state and the first excited state, but a realistic description of low-lying resonances is also obtained. For these resonances, the energies are in reasonable agreement with the experiment.

Figure 6 presents the  $^{11}\text{Be}$  proton and neutron densities for the  $1/2^+$  and  $1/2^-$  states. For both states, the proton density is rather peaked near the origin. In contrast, the neutron densities extend to large distances. This is a well-known effect, due to the weak binding energy of the last neutron. The rms radii, obtained from the densities, are displayed in Table 2. The proton and matter radii of the ground state are smaller than the experimental values, a result consistent with the previous study of Ref. [7]. Most likely, other configurations are necessary to improve the comparison with



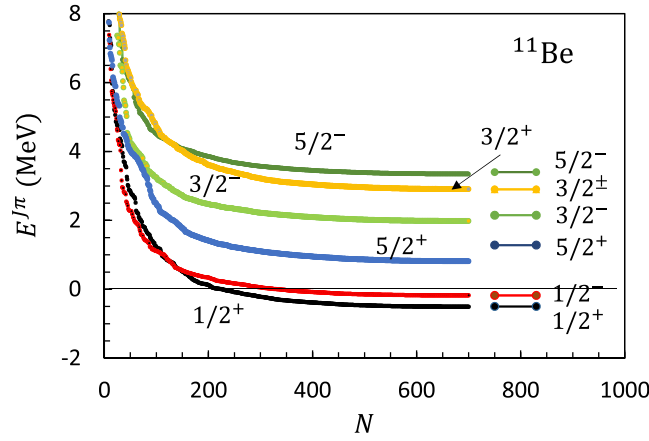

**Fig. 5.** Convergence of  $^{11}\text{Be}$  energies with respect to the number of basis functions  $N$ . The energies are defined from the  $\alpha + \alpha + n + n + n$  threshold. Experimental energies of low-lying states are shown on the right-hand side of the figure.

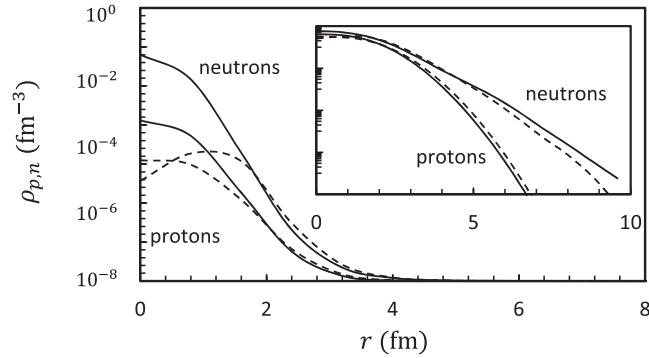

**Fig. 6.** Proton and neutron densities of the  $^{11}\text{Be}$  ground state (solid lines) and of the  $1/2^-$  state (dashed lines). The inset shows the same densities plotted in a logarithmic scale.

**Table 2.**  $^{11}\text{Be}$  properties: proton, neutron and matter radii, as well as the E1 transition probability from the ground to the first excited state.

|                                         | GCM                  | Exp.              | Ref. |
|-----------------------------------------|----------------------|-------------------|------|
| $\sqrt{\langle r^2 \rangle_p}$ (fm)     | 1.94                 | $2.463 \pm 0.015$ | [31] |
| $\sqrt{\langle r^2 \rangle_n}$ (fm)     | 2.56                 |                   |      |
| $\sqrt{\langle r^2 \rangle}$ (fm)       | 2.36                 | $2.73 \pm 0.05$   | [37] |
| $B(E1, 1/2^+ \rightarrow 1/2^-)$ (W.u.) | $6.3 \times 10^{-3}$ | $0.360 \pm 0.033$ | [38] |

experiment. The  $B(E1)$  value is also underestimated by the GCM. This was already observed in previous multicluster calculations [7,35], and in the NCSM [36]. The authors of Ref. [36] suggest that an explicit account of  $^{10}\text{Be} + n$  configurations is necessary to reproduce the large experimental value.

In Fig. 7, we analyse various energy curves of  $^{11}\text{Be}$ . In each case, a generator coordinate is kept fixed, and the SVM is applied to the 8 remaining generator coordinates. Although these curves cannot be strictly considered as potentials, they provide a valuable insight into the structure of  $^{11}\text{Be}$ . The minimum for  $R_{\alpha\alpha}$  is found near  $R_{\alpha\alpha} \approx 2$  fm, i.e. a value smaller than in  $^{10}\text{Be}$ . This result confirms



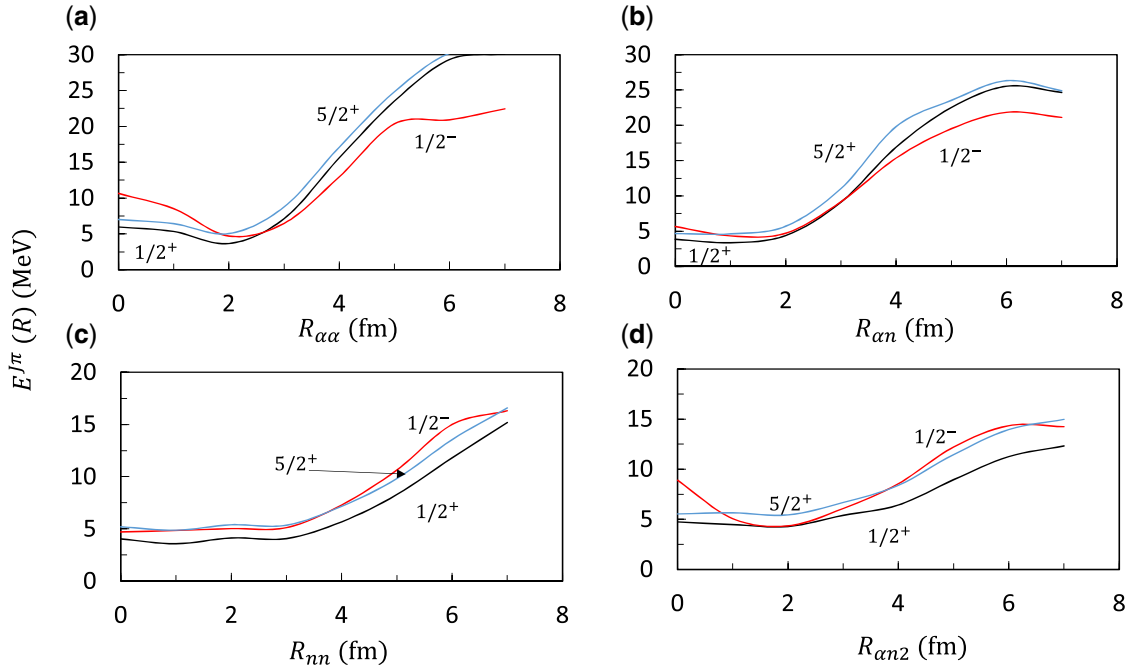

**Fig. 7.** Energy of the  $^{11}\text{Be}$  system (with respect to the  $\alpha + \alpha + n + n$  threshold) as a function of  $R_{\alpha\alpha}$  (a),  $R_{\alpha n}$  (b),  $R_{\alpha n2}$  (c), and  $R_{nn}$  (d).

that the  $\alpha + \alpha$  distance decreases when the number of external nucleon increases [7]. For  $R_{\alpha n}$ , the minimum is rather flat up to  $R_{\alpha n} \approx 2$  fm. Large values are therefore unlikely. The  $R_{nn}$  dependence is quite interesting: it shows a weak variation of the total energy. Consequently, it is important to include several configurations covering a wide interval. This conclusion holds for all considered states. The dependence on  $R_{\alpha n2}$ , i.e. on the distance between the  $\alpha + \alpha$  c.m. and the third neutron, presents a flat minimum around  $R_{\alpha n} \approx 2$  fm.

## 5. Conclusion

The main goal of this paper is to investigate the  $^{10}\text{Be}$  and  $^{11}\text{Be}$  nuclei within a microscopic multicluster model. The only adjustable parameter is the admixture parameter  $u$ , involved in the Minnesota interaction, and fitted on the binding energy of the ground states. A challenge with many-body approaches is to cope with a large number of generator coordinates or, in other words, with a large number of degrees of freedom. We have confirmed that the SVM provides an excellent framework to address this issue. Although computer times are still quite long, they remain within reasonable limits on modern computers.

The multicluster model is based on 2  $\alpha$  clusters, and 2 or 3 surrounding neutrons. It provides an excellent description of the low-energy spectrum of both nuclei. In particular,  $^{11}\text{Be}$  is nicely reproduced, not only for bound states but also for resonances. The stability of the energies with the number of basis functions (see Fig. 5) shows that we also have a fair description of the continuum.

We have used the GCM wave functions to compute various properties. In particular, the  $^{10}\text{Be}$  and  $^{11}\text{Be}$  densities could be used to determine folding potentials. In  $^{10}\text{Be}$ , the rms radii are in good agreement with the experiment. A small effective charge should be introduced to improve the agreement for the  $B(E2)$  value. The rms radii in  $^{11}\text{Be}$ , however, are somewhat underestimated, and the  $B(E1)$  value is much smaller than the experiment. This is not surprising in a multicluster model

[7,35], and even in the NCSM [36]. As suggested in Ref. [36], couplings to  $^{10}\text{Be} + n$  configurations should be introduced explicitly.

Finally, we have analysed the structure of  $^{10}\text{Be}$  and  $^{11}\text{Be}$  with the energy curves, where one of the generator coordinates is fixed. This approach provides a qualitative overview of the nucleus. The  $\alpha + \alpha$  clustering decreases from  $^{10}\text{Be}$  to  $^{11}\text{Be}$ . It should likely disappear for heavier Be isotopes, such as  $^{14}\text{Be}$ .

### Acknowledgements

P. D. acknowledges the hospitality of the Yukawa Institute for Theoretical Physics, where most of this work was performed. This work was supported by the Fonds de la Recherche Scientifique - FNRS under Grant Numbers 4.45.10.08 and J.0049.19. Computational resources have been provided by the Consortium des Équipements de Calcul Intensif (CÉ%CI), funded by the Fonds de la Recherche Scientifique de Belgique (F.R.S.-FNRS) under Grant No. 2.5020.11 and by the Walloon Region. P. D. is Directeur de Recherches of F.R.S.-FNRS, Belgium.

### References

- [1] K. Ikeda, N. Takigawa, and H. Horiuchi, Prog. Theor. Phys. Suppl. **E68**, 464 (1968).
- [2] H. Horiuchi, K. Ikeda, and K. Katō, Prog. Theor. Phys. Suppl. **192**, 1 (2012).
- [3] P. Descouvemont and M. Dufour, *Clusters in Nuclei* (Springer, Berlin, 2012), Vol. 2.
- [4] M. Kimura, T. Suhara, and Y. Kanada-En'yo, Eur. Phys. J. A **52**, 373 (2016).
- [5] Y. Kanada-En'yo and H. Horiuchi, Frontiers of Physics **13**, 132108 (2018).
- [6] P. Descouvemont and D. Baye, Phys. Rev. C **31**, 2274 (1985).
- [7] P. Descouvemont, Nucl. Phys. A **699**, 463 (2002).
- [8] Y. Kanada-En'yo and H. Horiuchi, Prog. Theor. Phys. Suppl. **142**, 205 (2001).
- [9] Y. Kanada-En'yo, Phys. Rev. C **66**, 011303(R) (2002).
- [10] N. Itagaki and S. Okabe, Phys. Rev. C **61**, 044306 (2000).
- [11] N. Itagaki, S. Okabe, and K. Ikeda, Phys. Rev. C **62**, 034301 (2000).
- [12] N. Itagaki, S. Hirose, T. Otsuka, S. Okabe, and K. Ikeda, Phys. Rev. C **65**, 044302 (2002).
- [13] M. Ito, Phys. Lett. B **636** 293 (2006).
- [14] N. Itagaki, M. Ito, M. Milin, T. Hashimoto, H. Ishiyama, and H. Miyatake, Phys. Rev. C **77**, 067301 (2008).
- [15] M. Ito, N. Itagaki, H. Sakurai, and K. Ikeda, Phys. Rev. Lett. **100**, 182502 (2008).
- [16] K. Arai, Phys. Rev. C **69**, 014309 (2004).
- [17] Y. Ogawa, K. Arai, Y. Suzuki, and K. Varga, Nucl. Phys. A **673**, 122 (2000).
- [18] H. T. Fortune, Eur Phys. J. A **54**, 51 (2018).
- [19] P. Descouvemont and N. Itagaki, Phys. Rev. C **97**, 014612 (2018).
- [20] V. I. Kukulín and V. M. Krasnopol'sky, J. Phys. G: Nucl. Phys. **3**, 795 (1977).
- [21] K. Varga and Y. Suzuki, Phys. Rev. C **52**, 2885 (1995).
- [22] S. Satsuka and W. Horiuchi, Phys. Rev. C **100**, 024334 (2019).
- [23] D. R. Thompson, M. Lemere, and Y. C. Tang, Nucl. Phys. A **286**, 53 (1977).
- [24] M. Theeten, H. Matsumura, M. Orabi, D. Baye, P. Descouvemont, Y. Fujiwara, and Y. Suzuki, Phys. Rev. C **76**, 054003 (2007).
- [25] H. Horiuchi, Prog. Theor. Phys. Suppl. **62**, 90 (1977).
- [26] Y. C. Tang, Microscopic Description of the Nuclear Cluster Theory, in *Topics in Nuclear Physics II A Comprehensive Review of Recent Developments*, ed. T.T.S. Kuo, S.S.M. Wong (Springer, Berlin, 1981), p. 571.
- [27] D. Brink, Proc. Int. School of Physics "Enrico Fermi" Course XXXVI, p. 247 (1966).
- [28] K. Fujimura, D. Baye, P. Descouvemont, Y. Suzuki, and K. Varga, Phys. Rev. C **59**, 817 (1999).
- [29] M. Kamimura, Nucl. Phys. A **351**, 456 (1981).
- [30] I. Tanihata, H. Hamagaki, O. Hashimoto, Y. Shida, N. Yoshikawa, K. Sugimoto, O. Yamakawa, T. Kobayashi, and N. Takahashi, Phys. Rev. Lett. **55**, 2676 (1985).
- [31] W. Nörtershäuser et al., Phys. Rev. Lett. **102**, 062503 (2009).

- [32] D. R. Tilley, J. H. Kelley, J. L. Godwin, D. J. Millener, J. E. Purcell, C. G. Sheu, and H. R. Weller, Nucl. Phys. A **745**, 155 (2004).
- [33] I. Talmi and I. Unna, Phys. Rev. Lett. **4**, 469 (1960).
- [34] P. Descouvemont, Nucl. Phys. A **615**, 261 (1997).
- [35] Y. Kanada-En'yo, H. Horiuchi, and A. Doté, Nucl. Phys. A **687**, 146 (2001).
- [36] A. Calci, P. Navrátil, R. Roth, J. Dohet-Eraly, S. Quaglioni, and G. Hupin, Phys. Rev. Lett. **117**, 242501 (2016).
- [37] I. Tanihata, T. Kobayashi, O. Yamakawa, S. Shimoura, K. Ekuni, K. Sugimoto, N. Takahashi, T. Shimoda, and H. Sato, Phys. Lett. B **206**, 592 (1988).
- [38] J. H. Kelley, E. Kwan, J. E. Purcell, C. G. Sheu, and H. R. Weller, Nucl. Phys. A **880**, 88 (2012).
